# Supplementary material for: Lipid Surfaces and Glutamate Anions Enhance Formation of Dynamic Biomolecular Condensates Containing Bacterial Cell Division Protein FtsZ and Its DNA-Bound Regulator SlmA
Source: PubMed Central journal article supplement (PMC9670838; doi:10.1021/acs.biochem.2c00424), 2022-10-31
Supplement: bi2c00424_si_001.pdf [file bi2c00424_si_001.pdf]

# Supporting Information

## Lipid surfaces and glutamate anions enhance formation of dynamic biomolecular condensates containing bacterial cell division protein FtsZ and its DNA-bound regulator SlmA

*Gianfranco Paccione<sup>§</sup>, Miguel Á. Robles-Ramos<sup>§</sup>, Carlos Alfonso<sup>§</sup>, Marta Sobrinos-Sanguino<sup>§</sup>, William Margolin<sup>¶</sup>, Silvia Zorrilla<sup>§‡\*</sup>, Begoña Monterroso<sup>§‡\*</sup>, Germán Rivas<sup>§\*</sup>*

<sup>§</sup> Centro de Investigaciones Biológicas Margarita Salas, Consejo Superior de Investigaciones Científicas (CSIC), 28040-Madrid, Spain

<sup>¶</sup> Department of Microbiology and Molecular Genetics, McGovern Medical School, University of Texas, Houston, TX 77030, USA

### LIST OF FIGURES

|                 |    |
|-----------------|----|
| Figure S1 ..... | S1 |
| Figure S2 ..... | S2 |
| Figure S3 ..... | S3 |
| Figure S4 ..... | S4 |
| Figure S5 ..... | S5 |

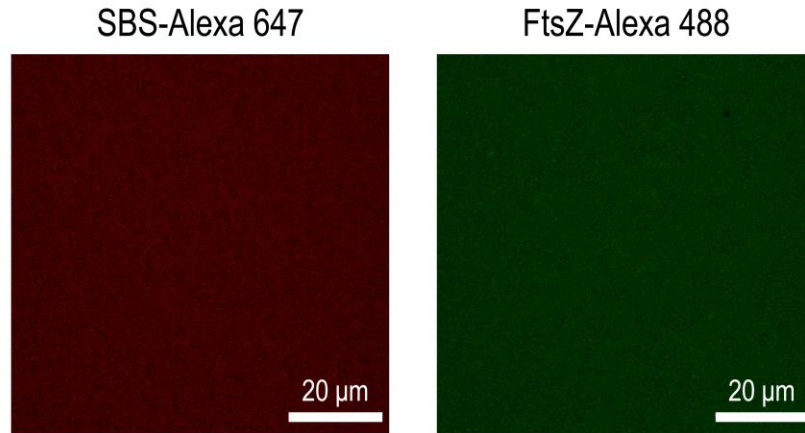

**Figure S1.** Individual behavior of SlmA·SBS (in the absence of FtsZ, left) and FtsZ (in the absence of SlmA·SBS, right) on a supported lipid bilayer. Fluorescence confocal microscopy images of samples in standard conditions, with the indicated elements.

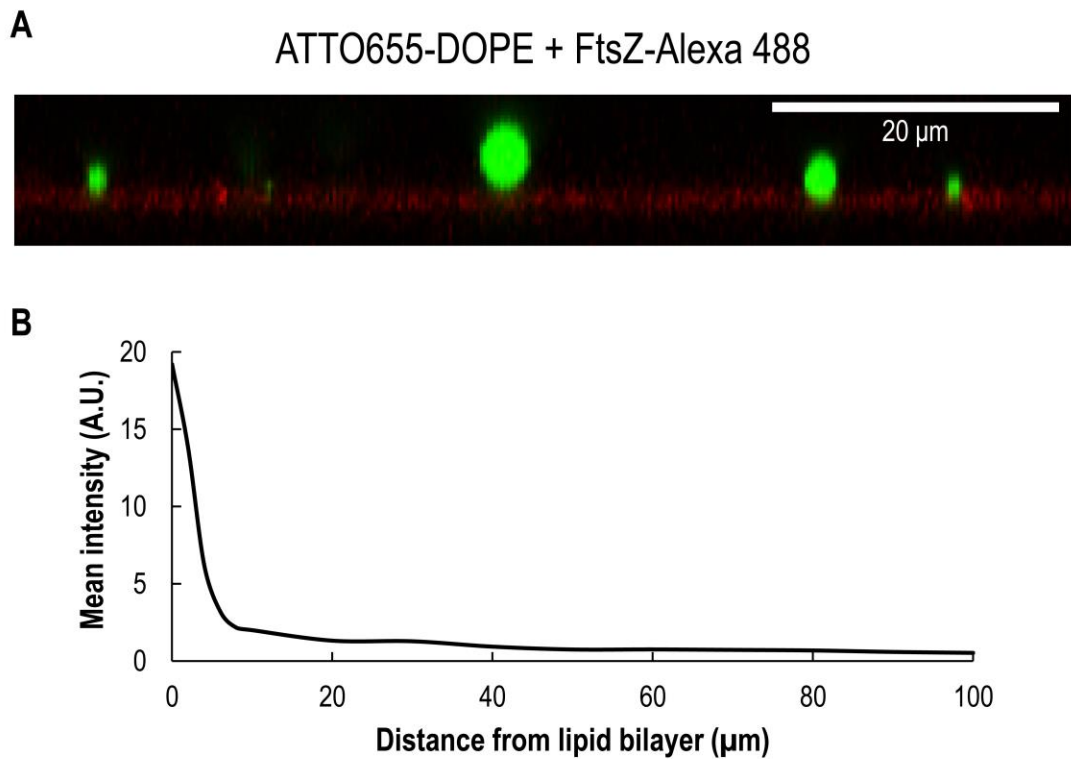

**Figure S2.** Arrangement of the FtsZ·SlmA·SBS condensates on a supported lipid bilayer. (A) Orthogonal view (YZ) of a Z-stack of fluorescence confocal microscopy images. Condensates in standard conditions. Lipid bilayer labeled with 0.05% mol ATTO655-DOPE. (B) Z-plot profile of the mean intensity of fluorescence images of FtsZ·SlmA·SBS droplets in standard conditions, after 60-min incubation.

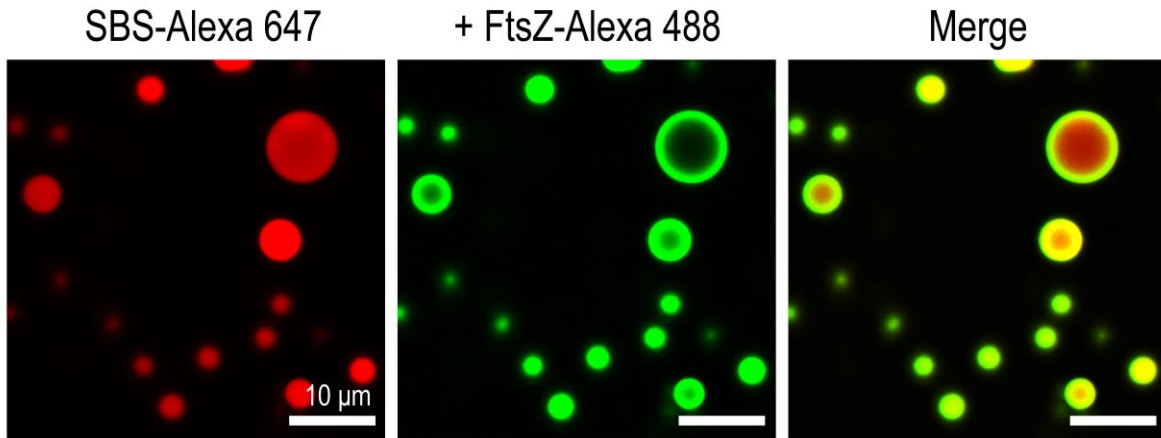

**Figure S3.** Reduced dynamics of condensates formed in 15 mM  $Mg^{2+}$  on a supported lipid bilayer. Fluorescence confocal microscopy images show the addition of FtsZ-Alexa 488 to FtsZ·SlmA·SBS condensates labeled with SBS-Alexa 647 formed in standard conditions but with 15 mM  $Mg^{2+}$  instead of 5 mM  $Mg^{2+}$ .

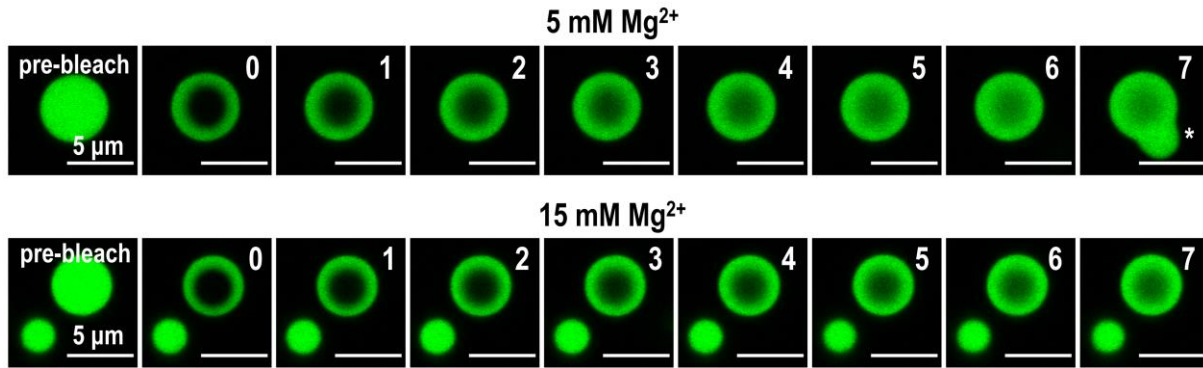

**Figure S4.** FRAP experiments to monitor the dynamics of the condensates under different conditions. Confocal microscopy images of similarly-sized condensates in standard conditions (top row), and with 15 mM Mg<sup>2+</sup> (bottom row). Samples contained 0.5 μM FtsZ-Alexa 488. Pre-bleach and recovery images are included. Time in minutes after bleaching is indicated on each image. Bleaching is performed at 60% laser power with 16 iterations, whereas pre-bleach and recovery images are obtained at 10% laser power. Recovery images are obtained every 60 s. Indicated with an asterisk, a fusion event can be observed after 7 minutes in standard conditions (5 mM Mg<sup>2+</sup>), after which images are not included due to fusion events obscuring fluorescence recovery evaluation.

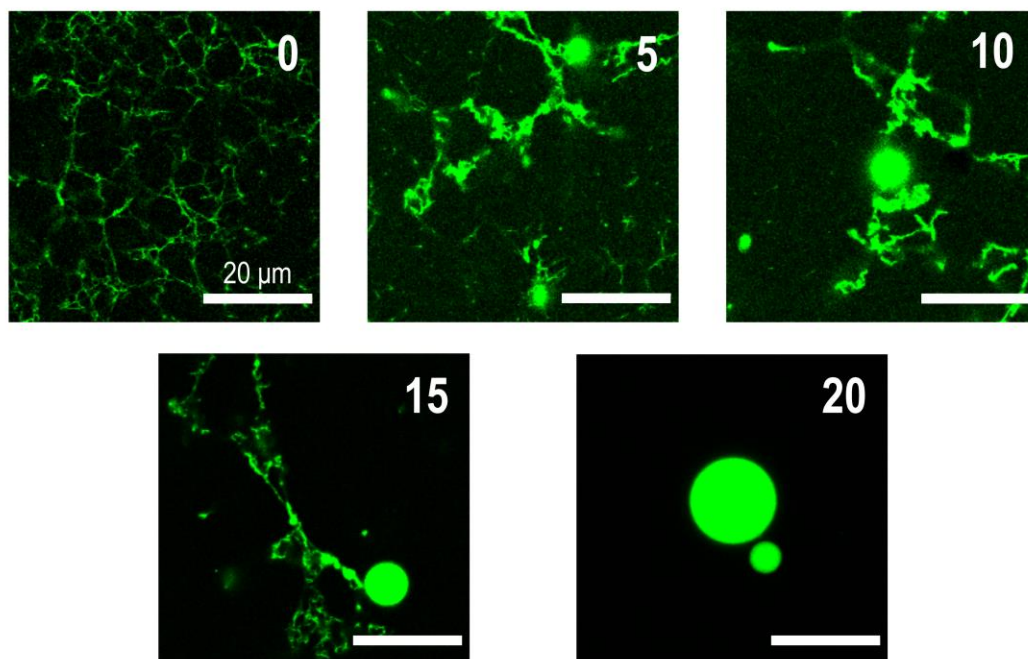

**Figure S5.** Time-evolution of polymers formed by FtsZ (FtsZ-Alexa 488) in the presence of SBS-bound SlmA and 1 mM GTP on a supported lipid bilayer in standard conditions. Time from FtsZ addition in minutes is indicated. The top row images were acquired with a higher gain to better visualize the polymers, while the bottom row show images acquired with lower gain to better visualize the condensates.
